# Supplementary material
Source: bioRxiv or medRxiv preprint supplement (https://www.biorxiv.org/highwire/filestream/49291/field_highwire_adjunct_files/2/165902-3.pdf)
Supplement: Supplementary file [file 165902-3.pdf]

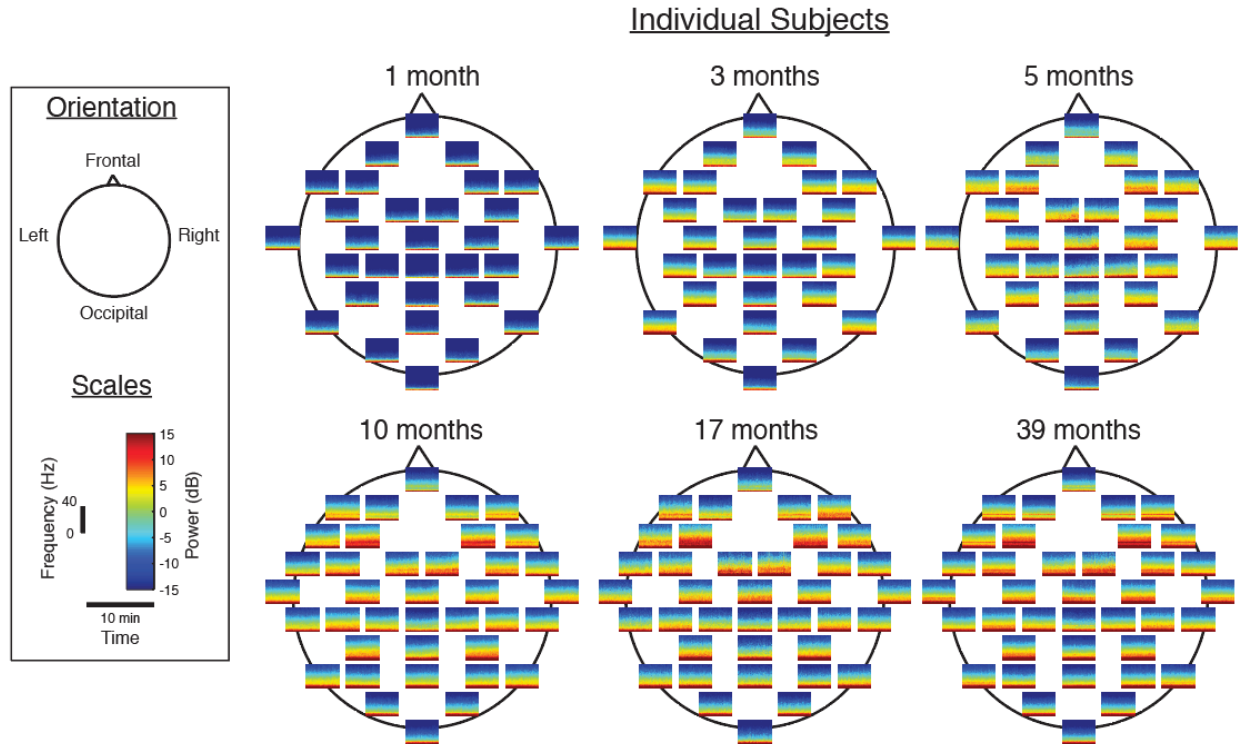

**Figure 4 – figure supplement 1.** Spatial distribution of EEG spectral power for frequencies from 0.1 to 40Hz during sevoflurane-maintained surgical anesthesia in individual subjects.

Spectrograms at each recording electrode location across the scalp are provided (with nearest neighbor Laplacian referencing). A 33-electrode EEG cap was used for infants aged 0 to 6 months old, and a 41-electrode EEG cap was used for infants older than 6 months. M1 and M2 were excluded from all analyses. Epoch size is 5 minutes.
